# Supplementary material for: Synthesis and reactivity of a bis-sultone cross-linker for peptideconjugation and [18F]-radiolabelling via unusual “double click” approach
Source: Royal Society of Chemistry journal article supplement (doi:10.1039/c1ob06600e), 2011-11-03

# Synthesis and Reactivity of a Bis-Sultone Cross-Linker for Peptide Conjugation and [<sup>18</sup>F]-Radiolabelling *via* Unusual “Double Click” Approach

Thomas Priem,<sup>a,b</sup> Cédric Bouteiller,<sup>\*a</sup> David Camporese,<sup>a</sup> Anthony Romieu,<sup>b,c</sup> and Pierre-Yves Renard<sup>b,c,d</sup>

<sup>a</sup>Advanced Accelerator Applications, 20 Rue Diesel, 01630 Saint-Genis-Pouilly, France

Fax: +33-4-50-99-30-71

Phone: +33-4-50-99-30-70

E-mail: [cedric.bouteiller@adacap.com](mailto:cedric.bouteiller@adacap.com)

Web site: <http://www.adacap.com>

<sup>b</sup>Equipe de Chimie Bio-Organique, COBRA-CNRS UMR 6014 & FR 3038, rue Lucien Tesnière, 76131 Mont-Saint-Aignan, France

Lab homepage: <http://ircof.crihan.fr>

<sup>c</sup>Université de Rouen, Place Emile Blondel, 76821 Mont-Saint-Aignan, France

<sup>d</sup>Institut Universitaire de France, 103 Boulevard Saint-Michel, 75005, Paris, France

## SUPPORTING INFORMATION

|                                                                                                                   |     |
|-------------------------------------------------------------------------------------------------------------------|-----|
| Abbreviations .....                                                                                               | S1  |
| Experimental procedures .....                                                                                     | S1  |
| RP-HPLC elution profile (system A) of 1-phenylacyl-1,3-propanesultone 1 .....                                     | S4  |
| RP-HPLC elution profile (system A) of 1-benzyl-1,3-propanesultone 2 .....                                         | S4  |
| <sup>1</sup> H NMR spectrum of bis-propanesultone 3 recorded in acetone- <i>d</i> <sub>6</sub> at 300 MHz .....   | S5  |
| <sup>13</sup> C NMR spectrum of bis-propanesultone 3 recorded in acetone- <i>d</i> <sub>6</sub> at 75.5 MHz ..... | S5  |
| ESI mass spectrum of bis-sultone 3 recorded in the negative mode. <sup>a</sup> .....                              | S6  |
| RP-HPLC elution profile (system A) of bis-sultone 3. <sup>a</sup> .....                                           | S6  |
| RP-HPLC elution profile (system A) of mono-fluoro-propanesultone 4. <sup>a</sup> .....                            | S7  |
| RP-HPLC elution profile (system A) of mono-fluoro-Boc-L-lysine-NH <sub>2</sub> conjugate 5. <sup>a</sup> .....    | S7  |
| RP-HPLC elution profile (system A) of mono-fluoro-peptide conjugate 6. <sup>a</sup> .....                         | S8  |
| RP-HPLC elution profile (system A) of mono-iodo-propanesultone. <sup>a</sup> .....                                | S8  |
| RP-HPLC elution profile (system A) of 1-oxo-1-phenyl-4-(propylamino)butane-2-sulfonic acid .....                  | S9  |
| RP-HPLC elution profile (system A) of 4-fluoro-1-oxo-1-phenylbutane-2-sulfonic acid .....                         | S9  |
| RP-HPLC elution profile (system A) of 4-chloro-1-oxo-1-phenylbutane-2-sulfonic acid .....                         | S10 |
| RP-HPLC elution profile (system A) of 4-bromo-1-oxo-1-phenylbutane-2-sulfonic acid .....                          | S10 |
| RP-HPLC elution profile (system A) of 4-iodo-1-oxo-1-phenylbutane-2-sulfonic acid .....                           | S11 |

## Abbreviations

The following abbreviations are used throughout the text of the ESI file: ESI, electrospray ionisation; RP-HPLC, reversed-phase high performance liquid chromatography; rt, room temperature; TFA, trifluoroacetic acid.

## Experimental procedures

### Mono-iodo-propanesultone

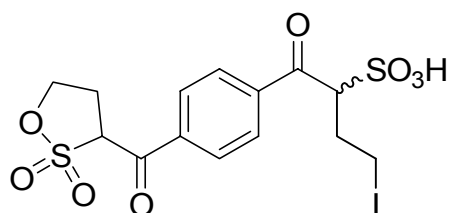

Bis-propanesultone **3** (52.4 mg, 0.14 mmol, 1 equiv.) was dissolved in dry CH<sub>3</sub>CN (5 mL). NaI (21 mg, 0.14 mmol, 1 equiv.) in solution in dry CH<sub>3</sub>CN (8 mL) was then slowly added. The resulting reaction mixture was stirred at rt and the reaction was checked for completion by RP-HPLC (system A). After 6 h, the reaction was stopped to avoid significant formation of the non-desired bis-iodo derivative. The crude product was then dissolved with aq. TFA and purified by RP-HPLC (system B, 1 injection,  $t_R = 35.0$ -41.5 min). The product-containing fractions were lyophilised to give the mono-iodo-propanesultone as an orange solid (33.1 mg, yield 49%, mixture of two racemic diastereomers).  $\delta_H$  (300 MHz, CD<sub>3</sub>OD) 8.29 (d,  $J$  8.7, 2H), 8.23 (d,  $J$  8.3, 2H), 5.65 (ddd,  $J$  1.9, 6.8, 8.5, 1H), 5.21-5.16 (m, 1H), 4.68-4.54 (m, 2H), 3.25-3.15 (m, 2H), 2.83-2.74 (m, 2H), 2.72-2.60 (m, 2H);  $\delta_C$  (75.5 MHz, CD<sub>3</sub>OD) 195.5, 189.5, 142.2, 139.9, 130.7, 129.9, 69.8, 68.1, 61.5, 34.1, 28.0, 3.4; MS (ESI<sup>-</sup>):  $m/z$  500.93 [M - H]<sup>-</sup>, calcd for C<sub>14</sub>H<sub>15</sub>IO<sub>8</sub>S<sub>2</sub> 501.93; HPLC (system A):  $t_R = 22.8$  and 23.0 min (two racemic diastereomers, purity 90%);  $\lambda_{max}$ (recorded during the HPLC analysis)/nm 265.

**Mono-fluoro-oxyamine-peptide conjugate.** The same protocol (synthesis and purification) than described for peptide conjugate **6** was used. An aminoxy-dodecapeptide (its sequence is confidential and not disclosed within this article but it contains an aminoxyacetic acid residue) was used as starting material. MS (ESI<sup>+</sup>):  $m/z$  885.33 [M + 2H]<sup>2+</sup>, 1769.53 [M + H]<sup>+</sup>, calcd for C<sub>73</sub>FH<sub>117</sub>N<sub>22</sub>O<sub>24</sub>S<sub>2</sub> 1768.80; HPLC

(system A):  $t_R = 20.9$  min (four diastereomers, purity 68%);  $\lambda_{\max}$ (recorded during the HPLC analysis)/nm 269.

**General procedure for the nucleophilic ring-opening of monosultones 1 and 2.** In a round bottom flask were introduced one equivalent of the nucleophile (halide, amine, alcohol, thiol or amino-acid derivatives) dissolved in  $\text{CH}_3\text{CN}$  (with a small amount of deionised water or DMF if complete solubility in  $\text{CH}_3\text{CN}$  was not obtained). The mixture was stirred at room temperature and one equiv. of monosultone (1 or 2) in solution in  $\text{CH}_3\text{CN}$  was then added. The reaction was checked for completion by RP-HPLC (system A), quenched by dilution with aq. TFA and  $\text{CH}_3\text{CN}$  and purified by RP-HPLC (system B, 1 injection).

- For potassium halide salts, 1.1 equivalent of Kryptofix[K222] was added,

- For amino acid hydrochloride derivatives, 1.1 equivalent of  $\text{K}_2\text{CO}_3$  (or  $\text{Cs}_2\text{CO}_3$ ) was added.

#### 1-Oxo-1-phenyl-4-(propylamino)butane-2-sulfonic acid

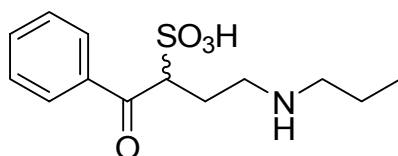

$\delta_H$  (300 MHz,  $\text{CD}_3\text{OD}$ ) 7.73-7.63 (m, 5H), 5.07 (t,  $J$  8.6, 1H), 4.63-4.56 (m, 1H), 4.37-4.29 (m, 1H), 3.90-3.84 (m, 2H), 2.87-2.77 (m, 2H), 1.93-1.84 (m, 2H), 0.96 (t,  $J$  7.3, 3H);  $\delta_C$  (75.5 MHz,  $\text{CD}_3\text{OD}$ ) 184.4, 134.6, 130.2, 130.1, 128.4, 73.3, 60.6, 54.6, 25.2, 21.8, 11.1; MS (ESI-):  $m/z$  284.20 [ $\text{M} - \text{H}$ ] $^-$ , calcd for  $\text{C}_{13}\text{H}_{19}\text{NO}_4\text{S}$  285.10; HPLC (system A):  $t_R = 12.1$  min (purity 94%);  $\lambda_{\max}$ (recorded during the HPLC analysis)/nm 254.

#### 4-Fluoro-1-oxo-1-phenylbutane-2-sulfonic acid

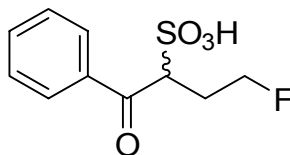

$\delta_H$  (300 MHz,  $\text{CD}_3\text{OD}$ ) 8.10 (d,  $J$  7.3, 2H), 7.62 (t,  $J$  7.5, 1H), 7.51 (t,  $J$  7.2, 2H), 5.14 (dd,  $J$  4.1, 9.4, 1H), 4.70-4.28 (m, 2H), 2.76-2.44 (m, 2H);  $\delta_C$  (75.5 MHz,  $\text{D}_2\text{O}$ ) 196.8, 139.1, 134.4, 129.6, 128.8, 72.0, 64.7, 55.1; MS (ESI-):  $m/z$  245.20 [ $\text{M} - \text{H}$ ] $^-$ , calcd for  $\text{C}_{10}\text{H}_{11}\text{FO}_4\text{S}$  246.04; HPLC (system A):  $t_R = 14.1$  min (purity 94%);  $\lambda_{\max}$ (recorded during the HPLC analysis)/nm 254.

#### 4-Chloro-1-oxo-1-phenylbutane-2-sulfonic acid

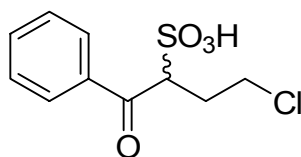

$\delta_{\text{H}}$  (300 MHz,  $\text{CD}_3\text{OD}$ ) 8.11 (d,  $J$  7.5, 2H), 7.62 (t,  $J$  7.3, 1H), 7.55 (t,  $J$  7.4, 2H), 5.20 (dd,  $J$  4.5, 8.9, 1H), 3.76-3.47 (m, 2H), 2.74-2.66 (m, 1H), 2.66-2.51 (m, 1H);  $\delta_{\text{C}}$  (75.5 MHz,  $\text{CD}_3\text{OD}$ ) 196.5, 139.0, 134.5, 130.3, 129.6, 64.2, 43.7, 33.4; MS (ESI-):  $m/z$  261.07 [ $\text{M} - \text{H}$ ] $^-$ , calcd for  $\text{C}_{10}\text{H}_{11}\text{ClO}_4\text{S}$  262.01; HPLC (system A):  $t_{\text{R}} = 17.3$  min (purity 93%);  $\lambda_{\text{max}}$ (recorded during the HPLC analysis)/nm 254.

#### 4-Bromo-1-oxo-1-phenylbutane-2-sulfonic acid

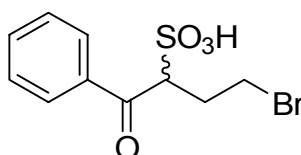

$\delta_{\text{H}}$  (300 MHz,  $\text{CD}_3\text{OD}$ ) 8.10 (d,  $J$  7.5, 2H), 7.62 (t,  $J$  7.3, 1H), 7.50 (t,  $J$  7.9, 2H), 5.21 (dd,  $J$  4.5, 8.9, 1H), 3.64-3.57 (m, 1H), 3.44-3.36 (m, 1H), 2.84-2.74 (m, 1H), 2.70-2.60 (m, 1H);  $\delta_{\text{C}}$  (75.5 MHz,  $\text{CD}_3\text{OD}$ ) 196.1, 139.0, 134.4, 130.3, 129.5, 65.3, 33.4, 31.9; MS (ESI-):  $m/z$  304.93 [ $\text{M} - \text{H}$ ] $^-$ , 418.80 [ $\text{M} + \text{TFA} - \text{H}$ ] $^-$ , calcd for  $\text{C}_{10}\text{H}_{11}\text{BrO}_4\text{S}$  305.96; HPLC (system A):  $t_{\text{R}} = 17.8$  min (purity 84%);  $\lambda_{\text{max}}$ (recorded during the HPLC analysis)/nm 254.

#### 4-Iodo-1-oxo-1-phenylbutane-2-sulfonic acid

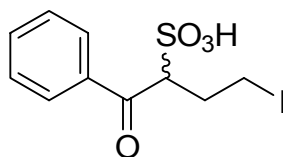

$\delta_{\text{H}}$  (300 MHz,  $\text{CD}_3\text{OD}$ ) 8.02 (d,  $J$  7.1, 2H), 7.63 (t,  $J$  7.5, 1H), 7.50 (t,  $J$  7.7, 2H), 5.16 (dd,  $J$  4.5, 8.7, 1H), 3.40-3.14 (m, 2H), 2.82-2.63 (m, 2H);  $\delta_{\text{C}}$  (75.5 MHz,  $\text{CD}_3\text{OD}$ ) 196.6, 139.0, 134.5, 130.5, 129.6, 67.3, 34.4, 3.4; MS (ESI-):  $m/z$  352.87 [ $\text{M} - \text{H}$ ] $^-$ , calcd for  $\text{C}_{10}\text{H}_{11}\text{IO}_4\text{S}$  353.94; HPLC (system A):  $t_{\text{R}} = 19.7$  min (purity 98%);  $\lambda_{\text{max}}$ (recorded during the HPLC analysis)/nm 254.

### RP-HPLC elution profile (system A) of 1-phenylacetyl-1,3-propanesultone 1.

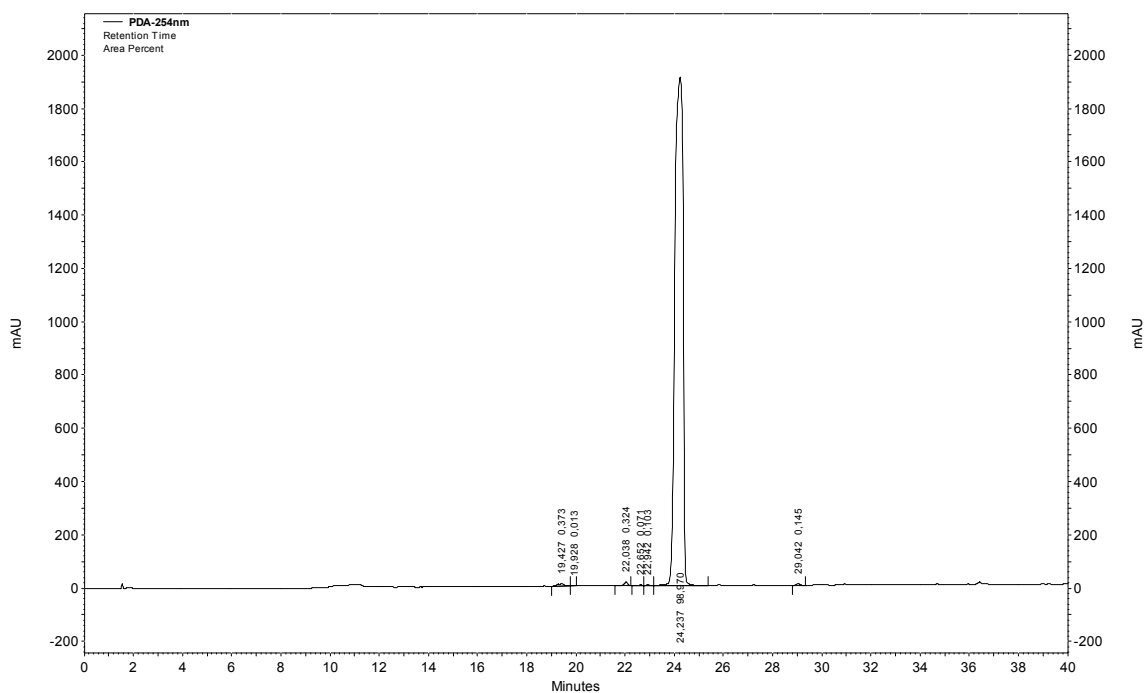

### RP-HPLC elution profile (system A) of 1-benzyl-1,3-propanesultone 2.

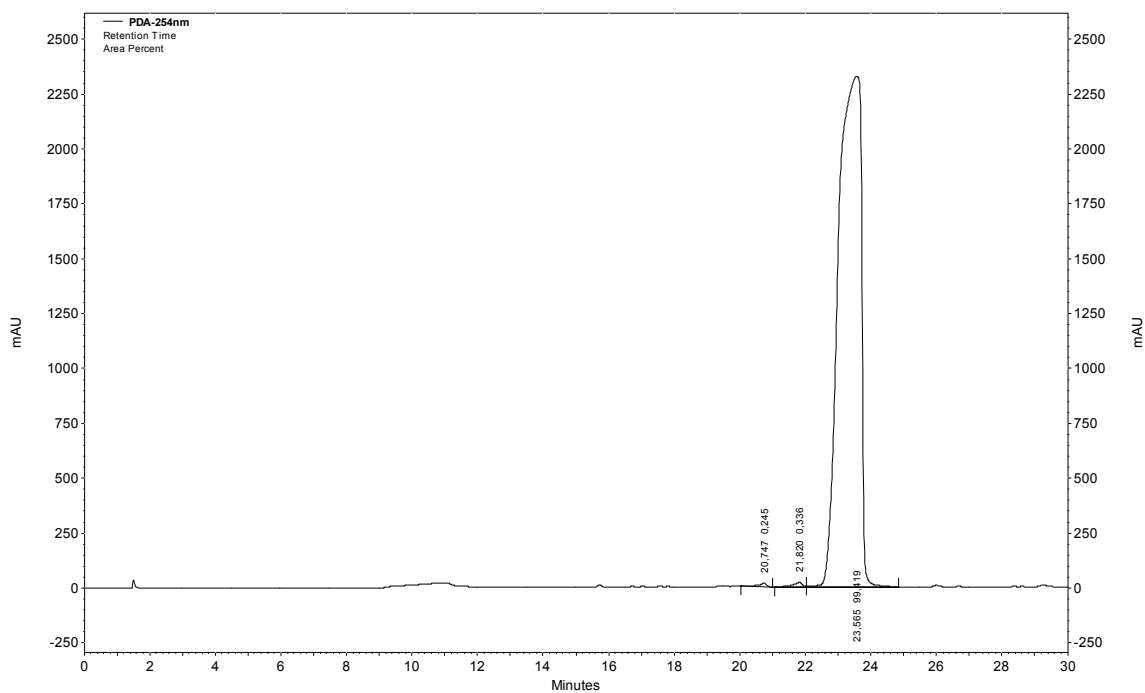

### $^1\text{H}$ NMR spectrum of bis-propanesultone **3** recorded in acetone- $d_6$ at 300 MHz.

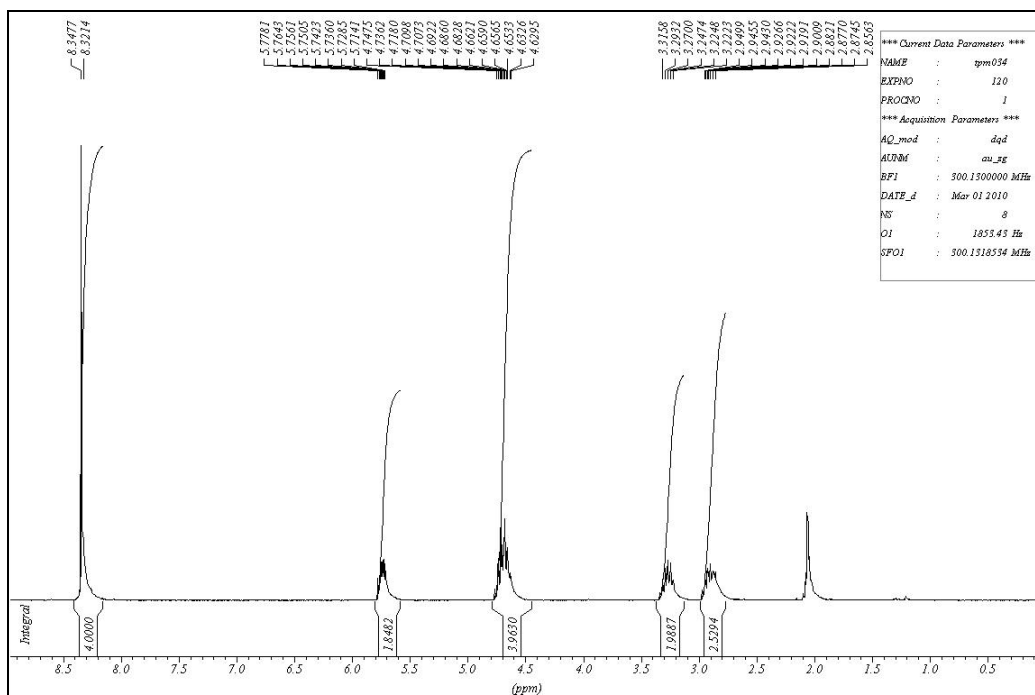

### $^{13}\text{C}$ NMR spectrum of bis-propanesultone **3** recorded in acetone- $d_6$ at 75.5 MHz.

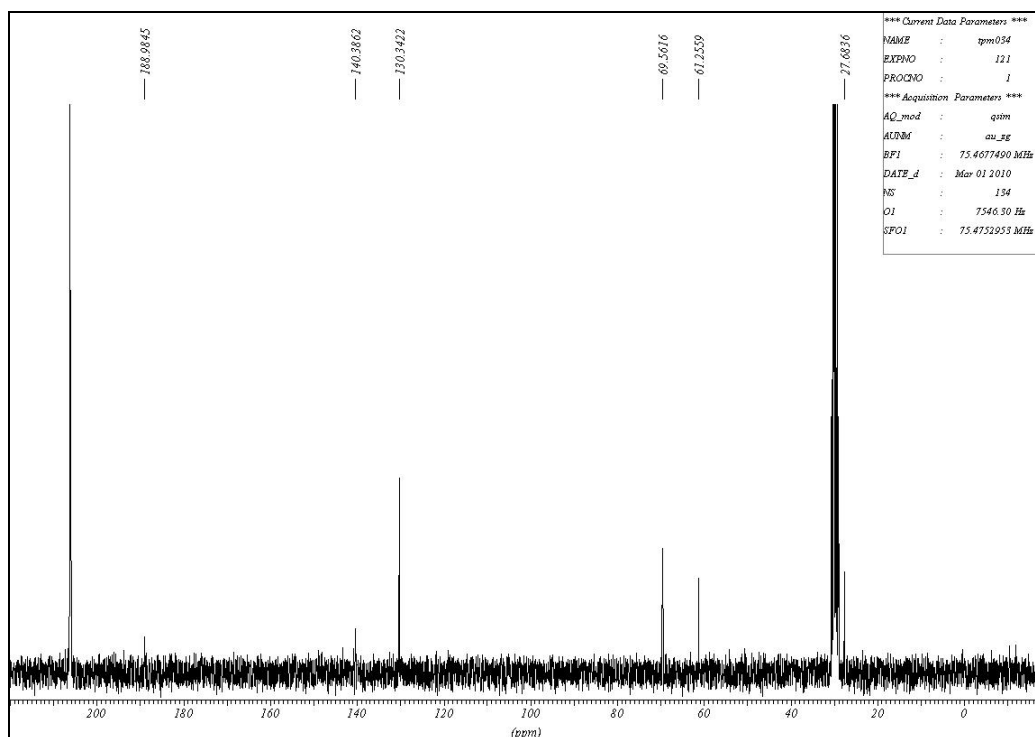

### ESI mass spectrum of bis-sultone **3** recorded in the negative mode.<sup>a</sup>

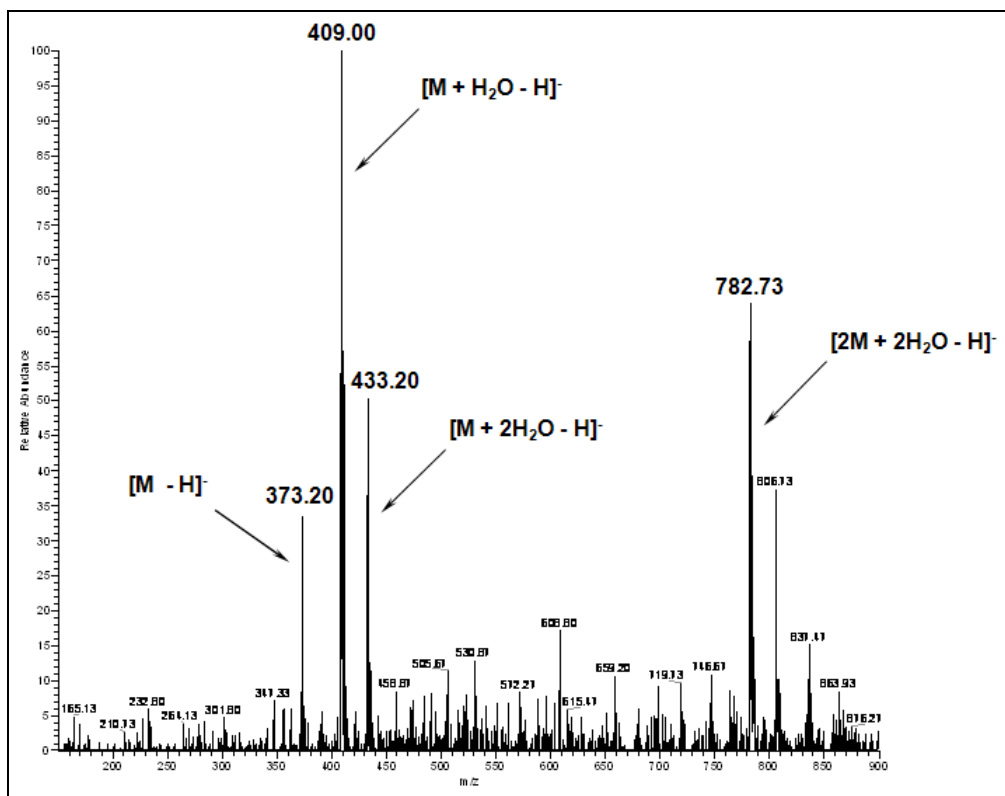

<sup>a</sup>hydration of sultone moieties was occurred during the ionisation process.

### RP-HPLC elution profile (system A) of bis-sultone **3**.<sup>a</sup>

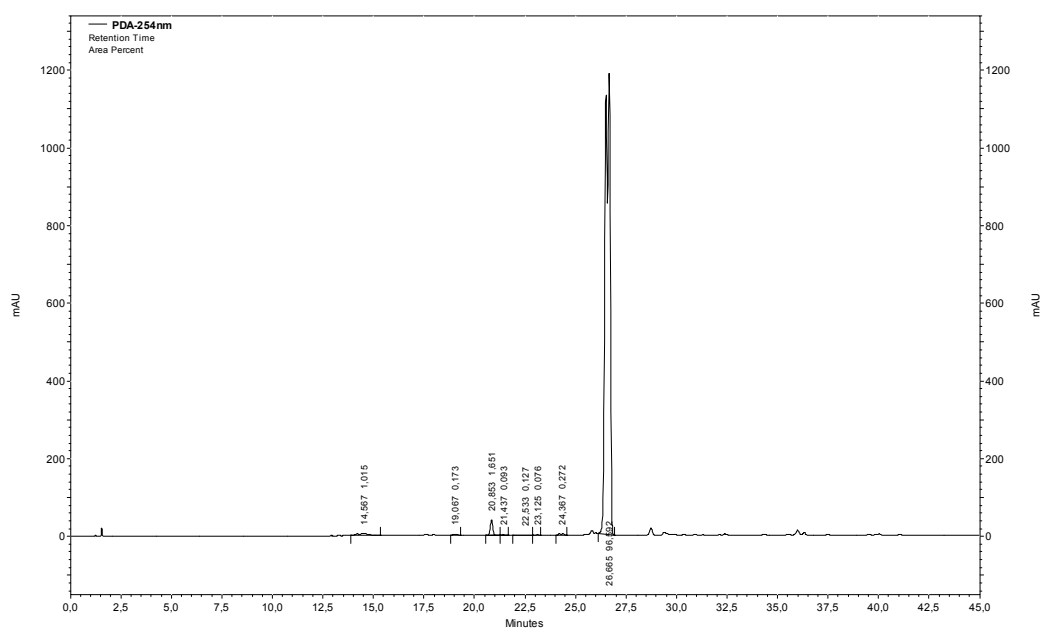

<sup>a</sup>A doublet peak was observed because compound **3** is a mixture of two racemic diastereomers.

### RP-HPLC elution profile (system A) of mono-fluoro-propanesultone **4**.<sup>a</sup>

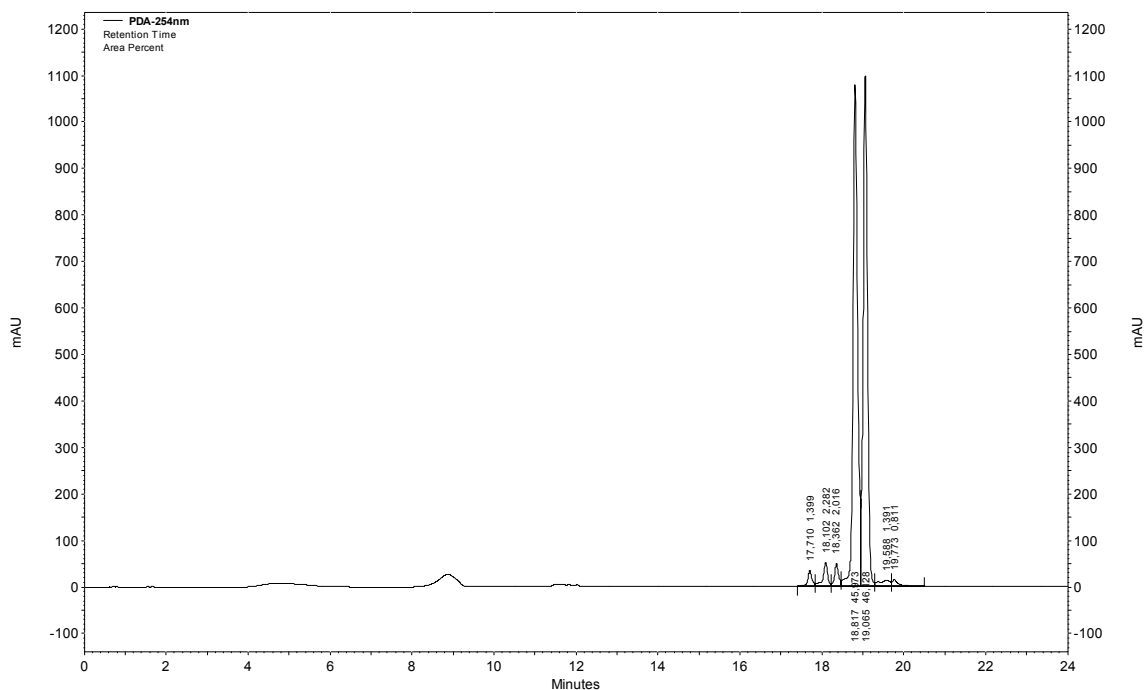

### RP-HPLC elution profile (system A) of mono-fluoro-Boc-L-lysine-NH<sub>2</sub> conjugate **5**.<sup>a</sup>

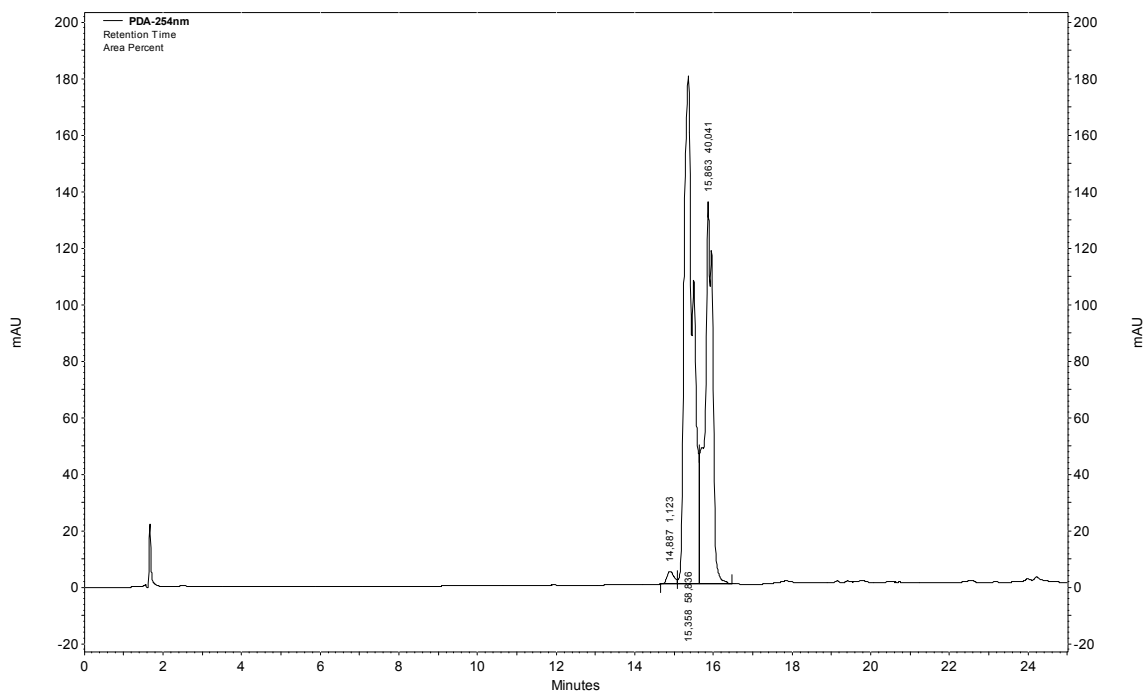



### RP-HPLC elution profile (system A) of mono-fluoro-peptide conjugate 6.<sup>a</sup>

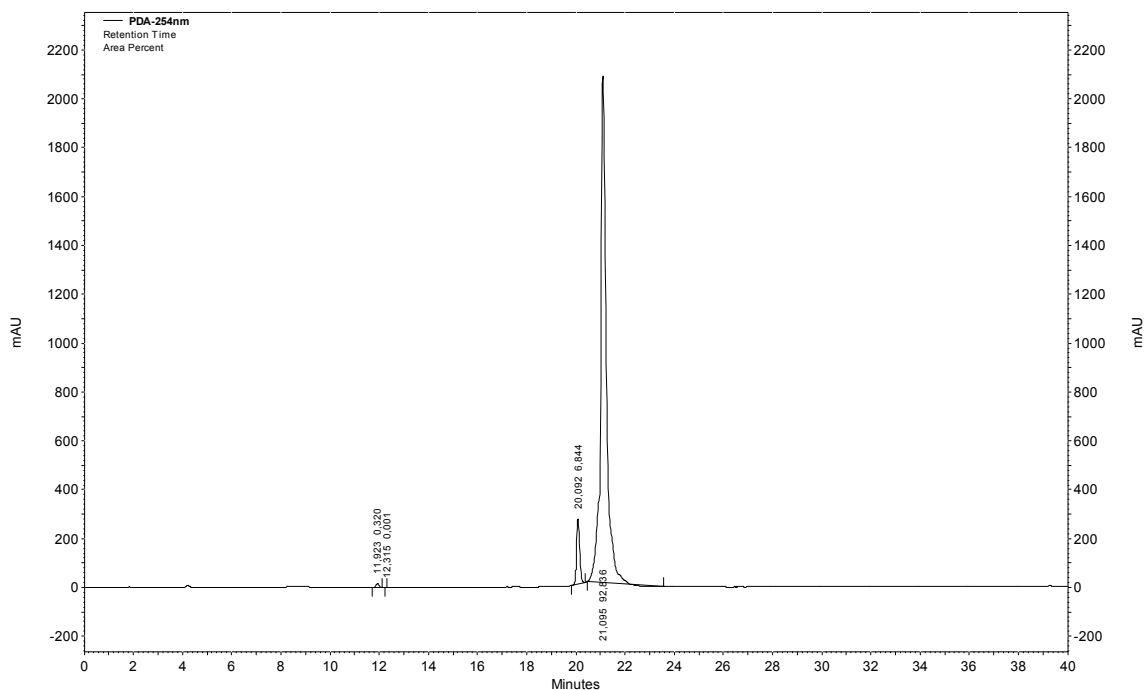

<sup>a</sup>This conjugate is a mixture of four diastereomers.

### RP-HPLC elution profile (system A) of mono-iodo-propanesultone.<sup>a</sup>

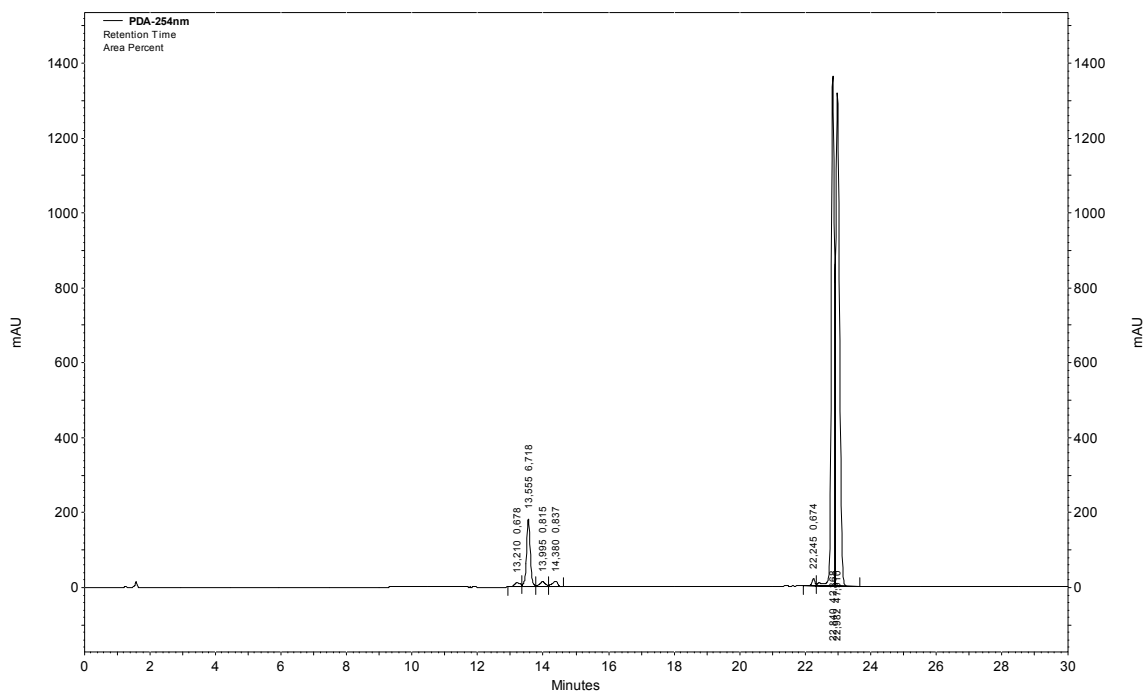

<sup>a</sup>A doublet peak was observed because this compound is a mixture of two racemic diastereomers.

### RP-HPLC elution profile (system A) of 1-oxo-1-phenyl-4-(propylamino)butane-2-sulfonic acid.

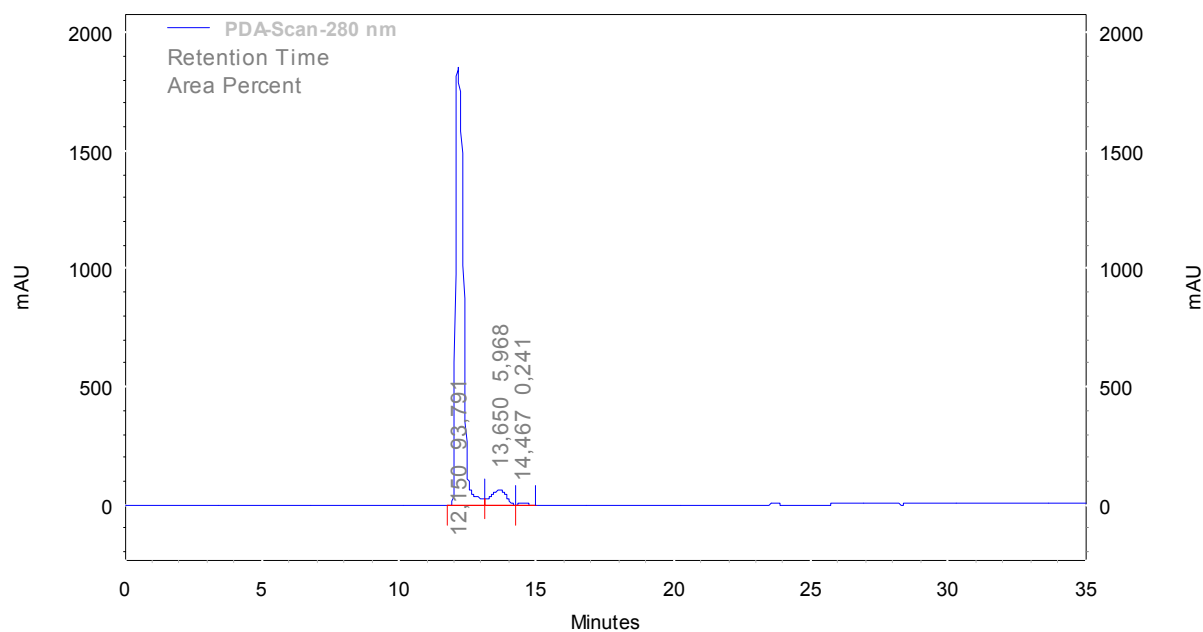

### RP-HPLC elution profile (system A) of 4-fluoro-1-oxo-1-phenylbutane-2-sulfonic acid.

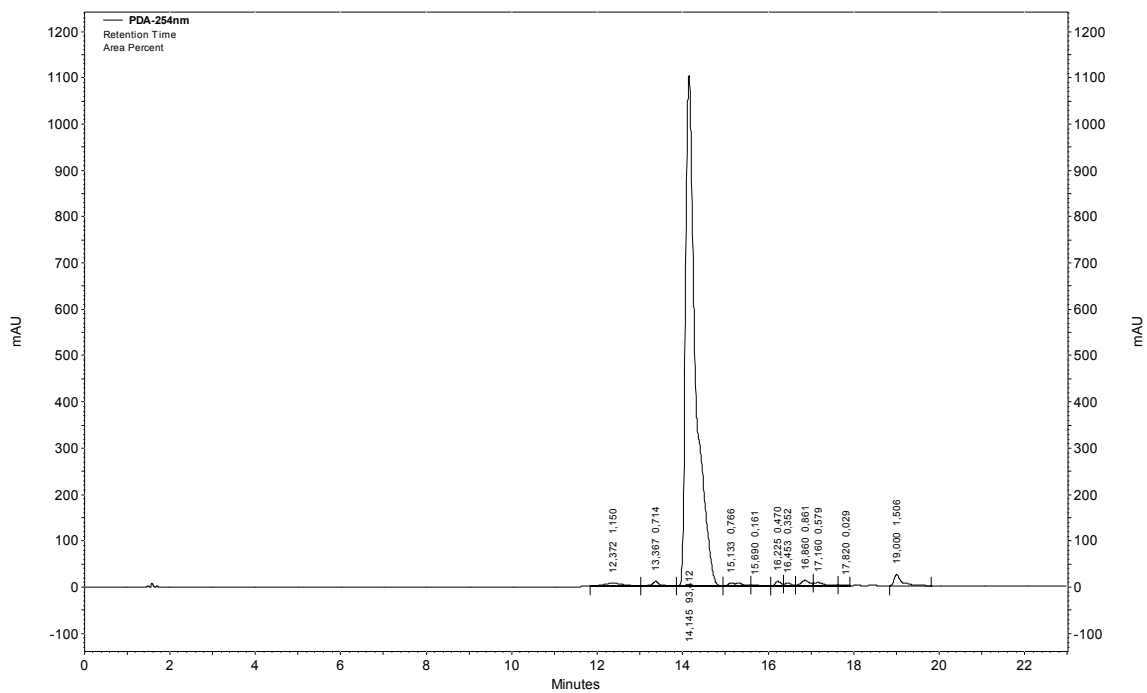

### RP-HPLC elution profile (system A) of 4-chloro-1-oxo-1-phenylbutane-2-sulfonic acid.

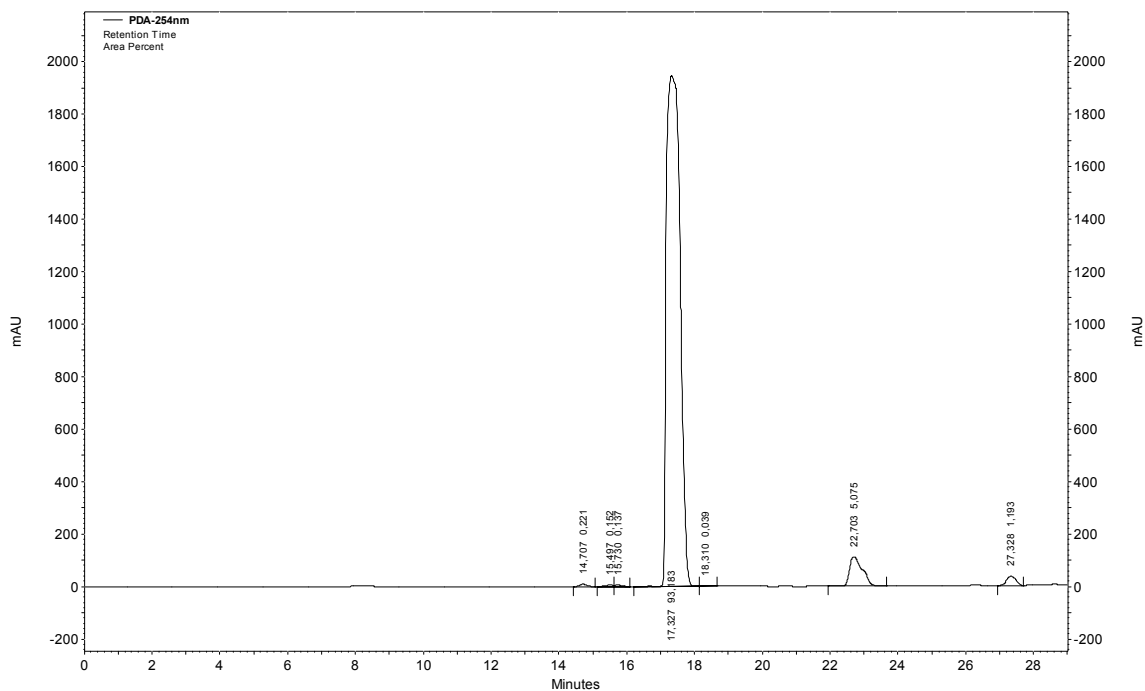

### RP-HPLC elution profile (system A) of 4-bromo-1-oxo-1-phenylbutane-2-sulfonic acid.

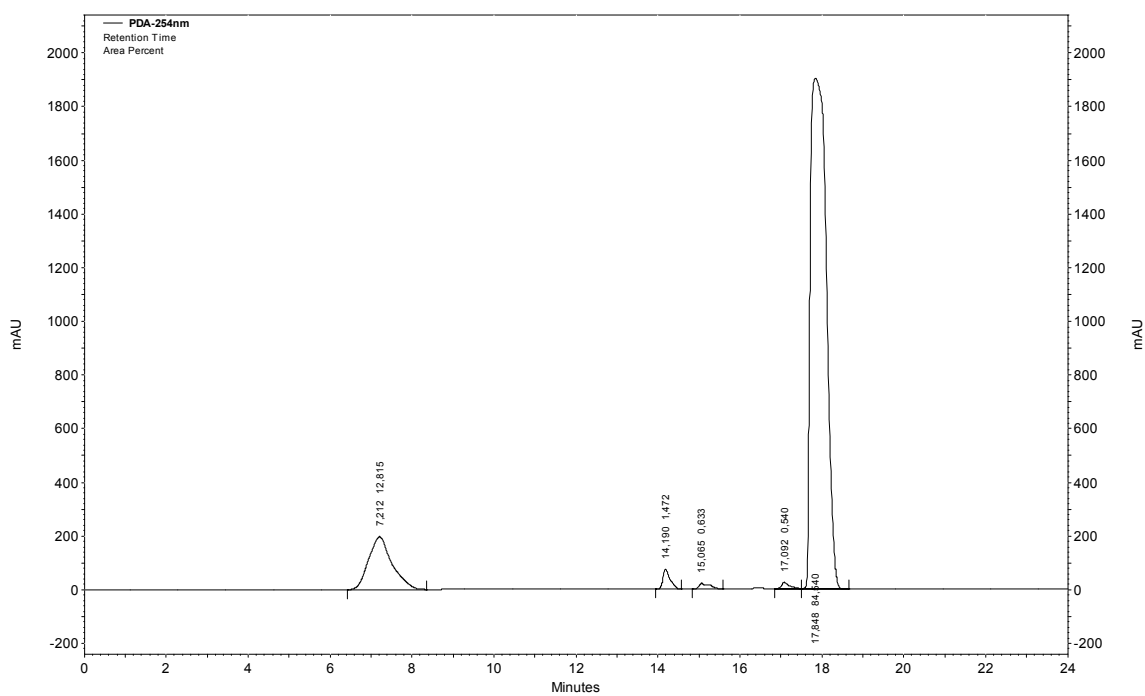

### RP-HPLC elution profile (system A) of 4-iodo-1-oxo-1-phenylbutane-2-sulfonic acid.

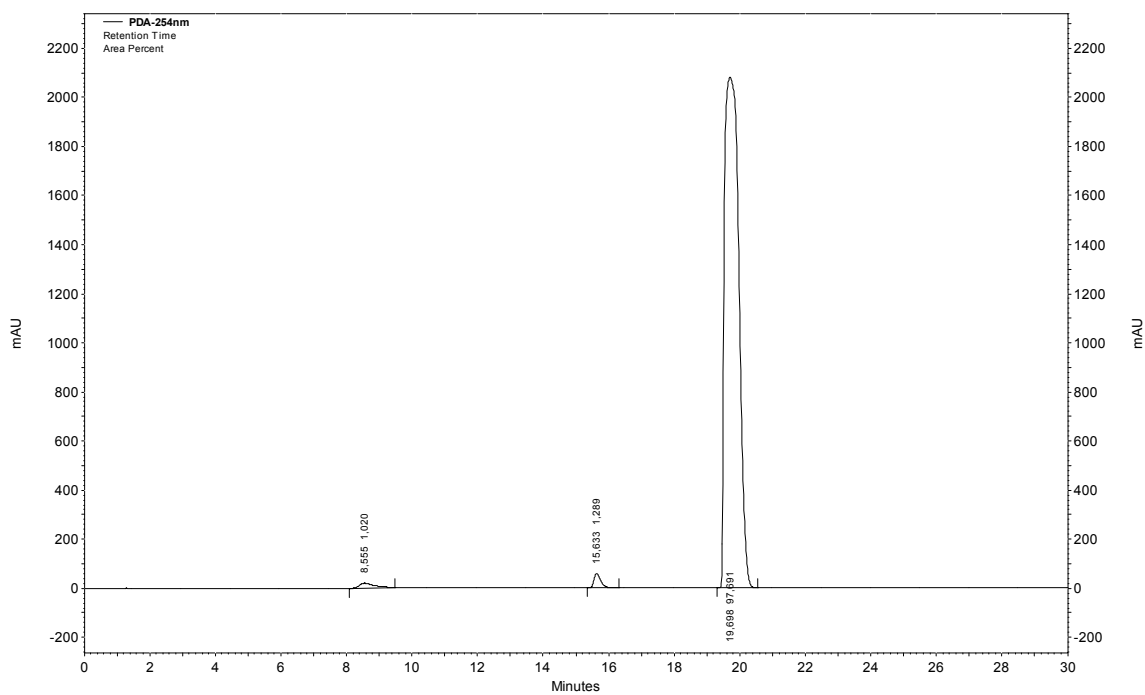

Supplement: c1ob06600e.pdf [file c1ob06600e.pdf]
